# Supplementary material for: Computational studies of the binding profile of phosphoinositide PtdIns (3,4,5) P3 with the pleckstrin homology domain of an oomycete cellulose synthase
Source: PubMed Central journal article supplement (PMC4746654; doi:10.1038/srep20555), 2016-02-09
Supplement: srep20555-s1.pdf [file srep20555-s1.pdf]

# Supplementary Material

Computational studies of the binding profile of phosphoinositide PtdIns(3,4,5)P<sub>3</sub> with the pleckstrin homology domain of an oomycete cellulose synthase

Guanglin Kuang<sup>1</sup>, Vincent Bulone<sup>2</sup>, and Yaoquan Tu<sup>1,\*</sup>

<sup>1</sup> Division of Theoretical Chemistry and Biology, School of Biotechnology, Royal Institute of Technology (KTH), AlbaNova University Center, Stockholm, 10691, Sweden

<sup>2</sup> Division of Glycoscience, School of Biotechnology, Royal Institute of Technology (KTH), AlbaNova University Center, Stockholm, 106 91, Sweden

\* E-mail: [yaoquan@kth.se](mailto:yaoquan@kth.se)

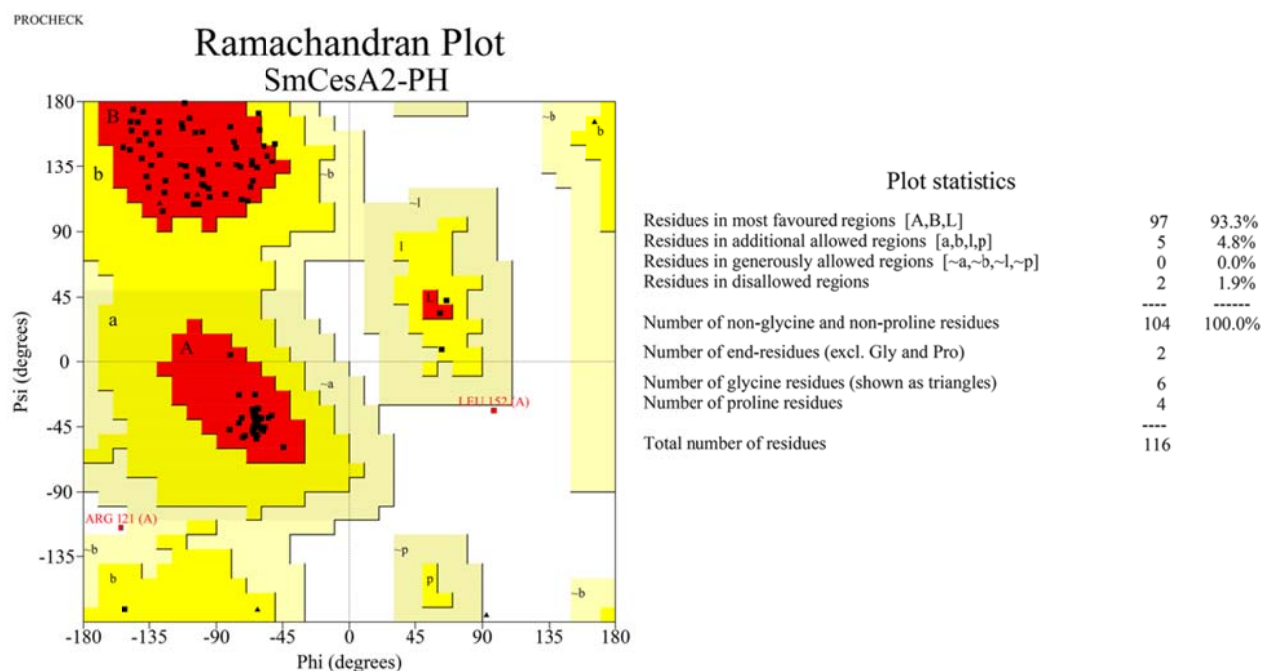

**Supplementary Figure S1. Ramachandran plot of the homology model of SmCesA2-PH.**

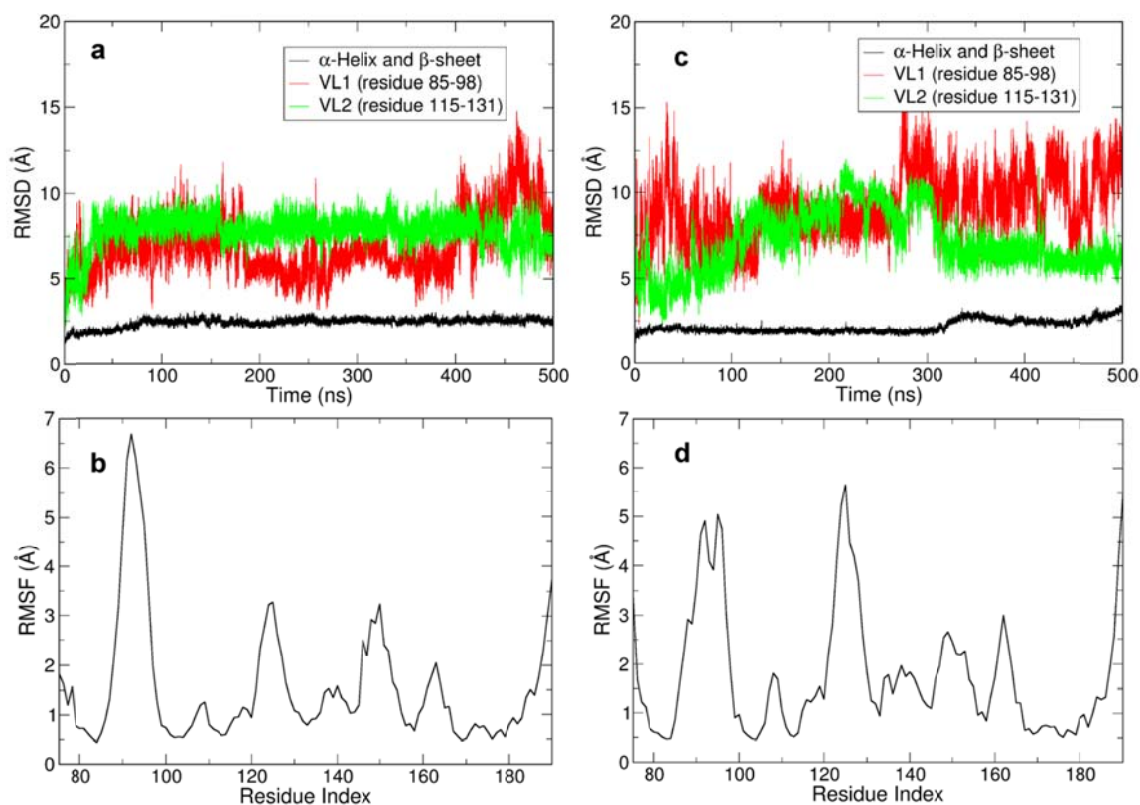

**Supplementary Figure S2. Dynamic behaviors of SmCesA2-PH in two independent MD simulations with the Amber99SB force field.** (a, c) RMSD plots of the backbone atoms of the  $\beta$ -sandwich and  $\alpha$ -helix core structure (black), VL1 (red) and VL2 (green) of SmCesA2-PH. (b, d) The RMSF plot of SmCesA2-PH.

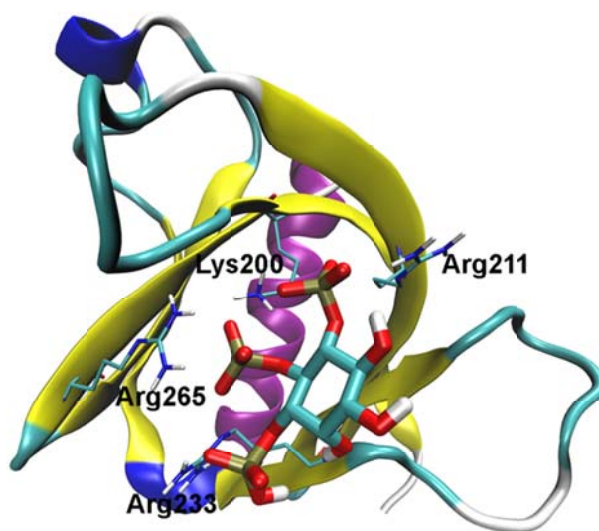

**Supplementary Figure S3. Binding mode of Ins(3,4,5)P<sub>3</sub> with the template structure TAPP1-PH.**

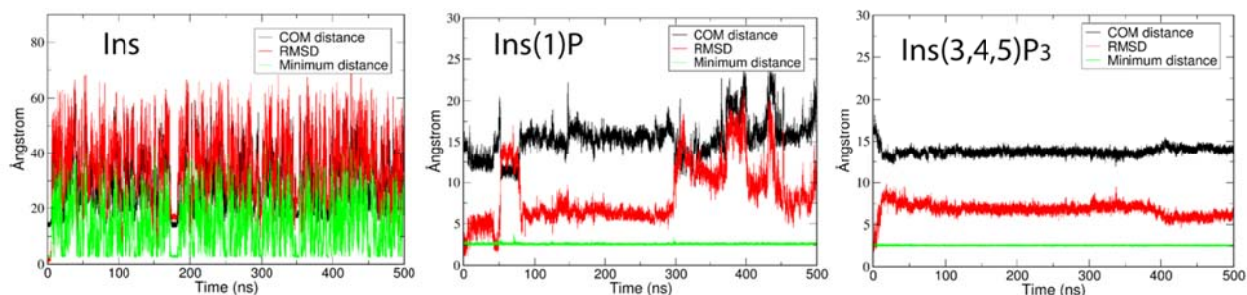

**Supplementary Figure S4.** Some MD plots of the head groups used to monitor their binding processes with SmCesA2-PH in the MD simulations with different initial velocities (second run). COM distance is the distance between the centers of mass (COMs) of the head group and the protein. RMSD is the root mean square deviation of the head group conformation in the MD simulations after the alignment of the protein. Minimum distance is the minimum distance between the head group and protein heavy atoms.

**Supplementary Table S1.** Schrödinger XP docking scores of Ins(3,4,5)P<sub>3</sub> with the mutated forms of the hot-spot residues identified by molecular docking and molecular dynamics simulations.

|           | Glide XP Docking Score<br>(kcal/mol) |
|-----------|--------------------------------------|
| wild type | -7.57                                |
| K85A      | -7.03                                |
| K88A      | -7.00                                |
| K100A     | -6.75                                |
| R102A     | -7.27                                |

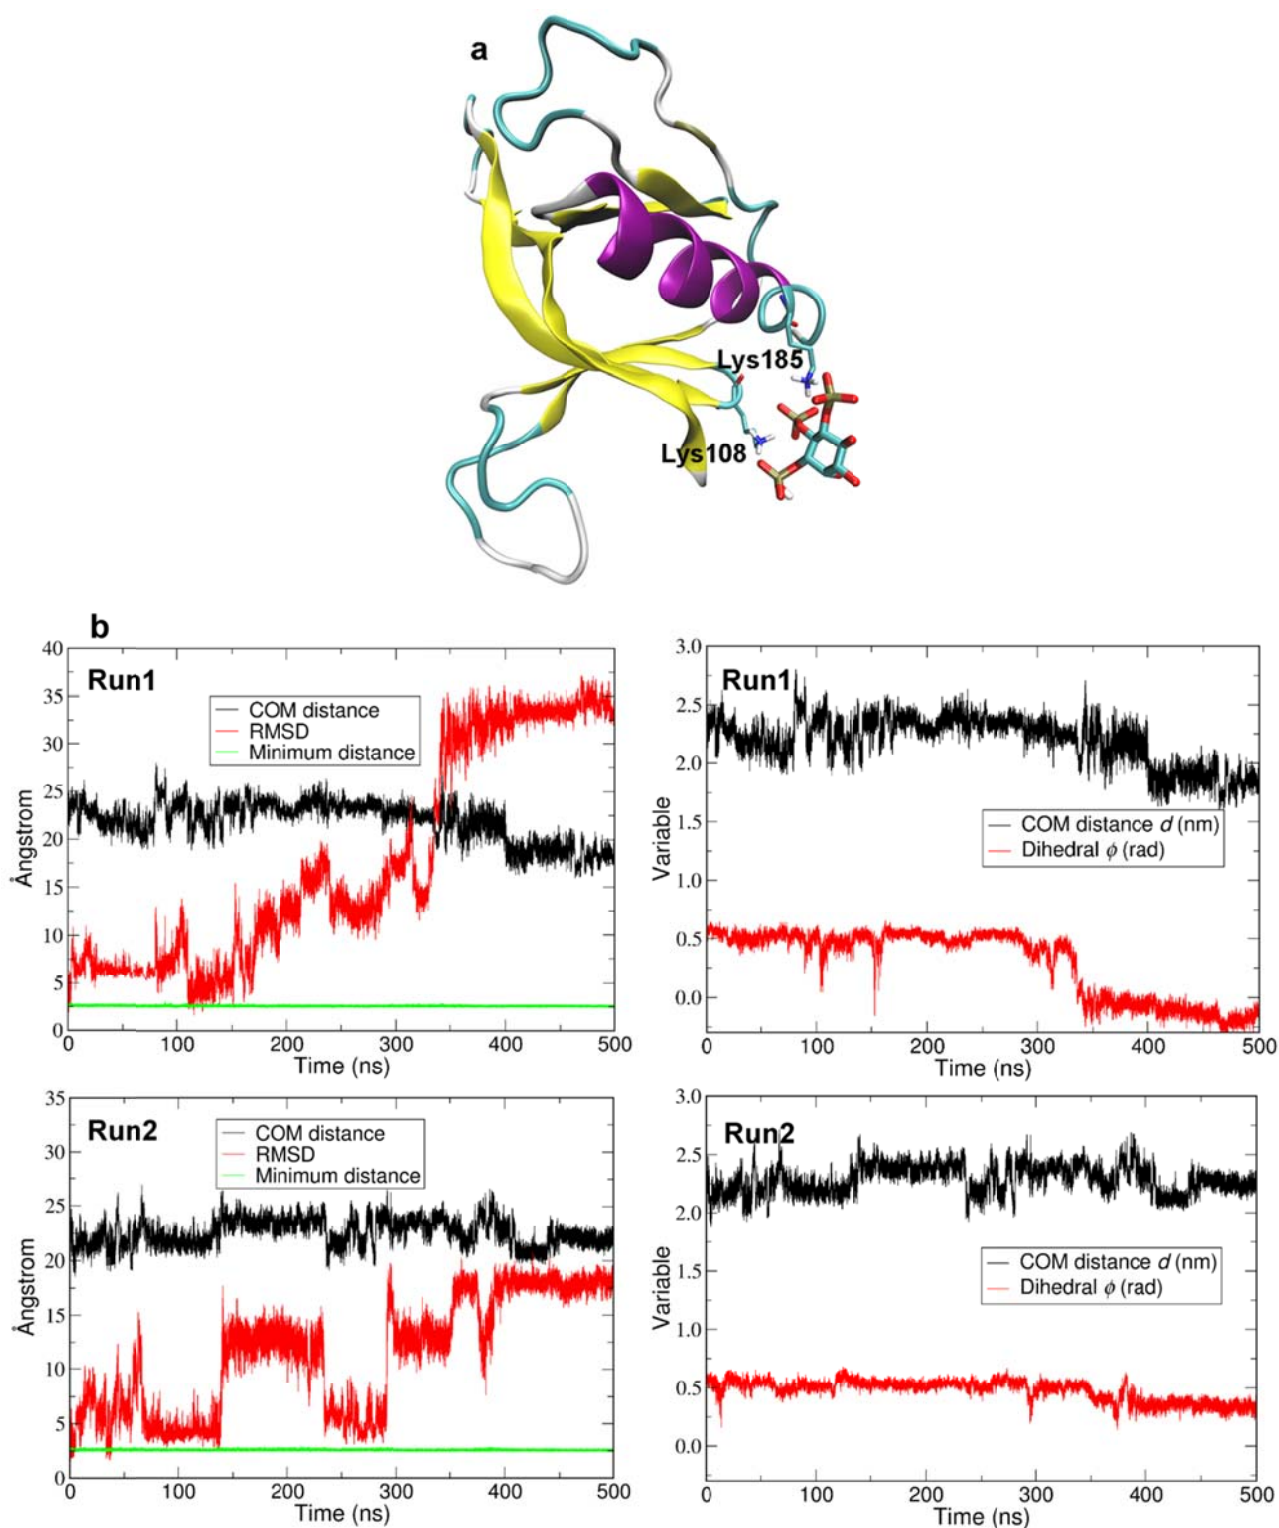

**Supplementary Figure S5. (a) Binding mode of Ins(3,4,5)P<sub>3</sub> in a meta-stable state. (b) Some parameters to monitor the binding profile of the meta-stable state. COM distance is the distance between the centers of mass (COMs) of the inositol head group and the protein. RMSD is the root mean square deviation of the head group conformation in the MD simulation after the alignment of the protein. Minimum distance is the minimum distance between the head group and protein heavy atoms. Dihedral  $\phi$  is the same as that defined in the Method section.**

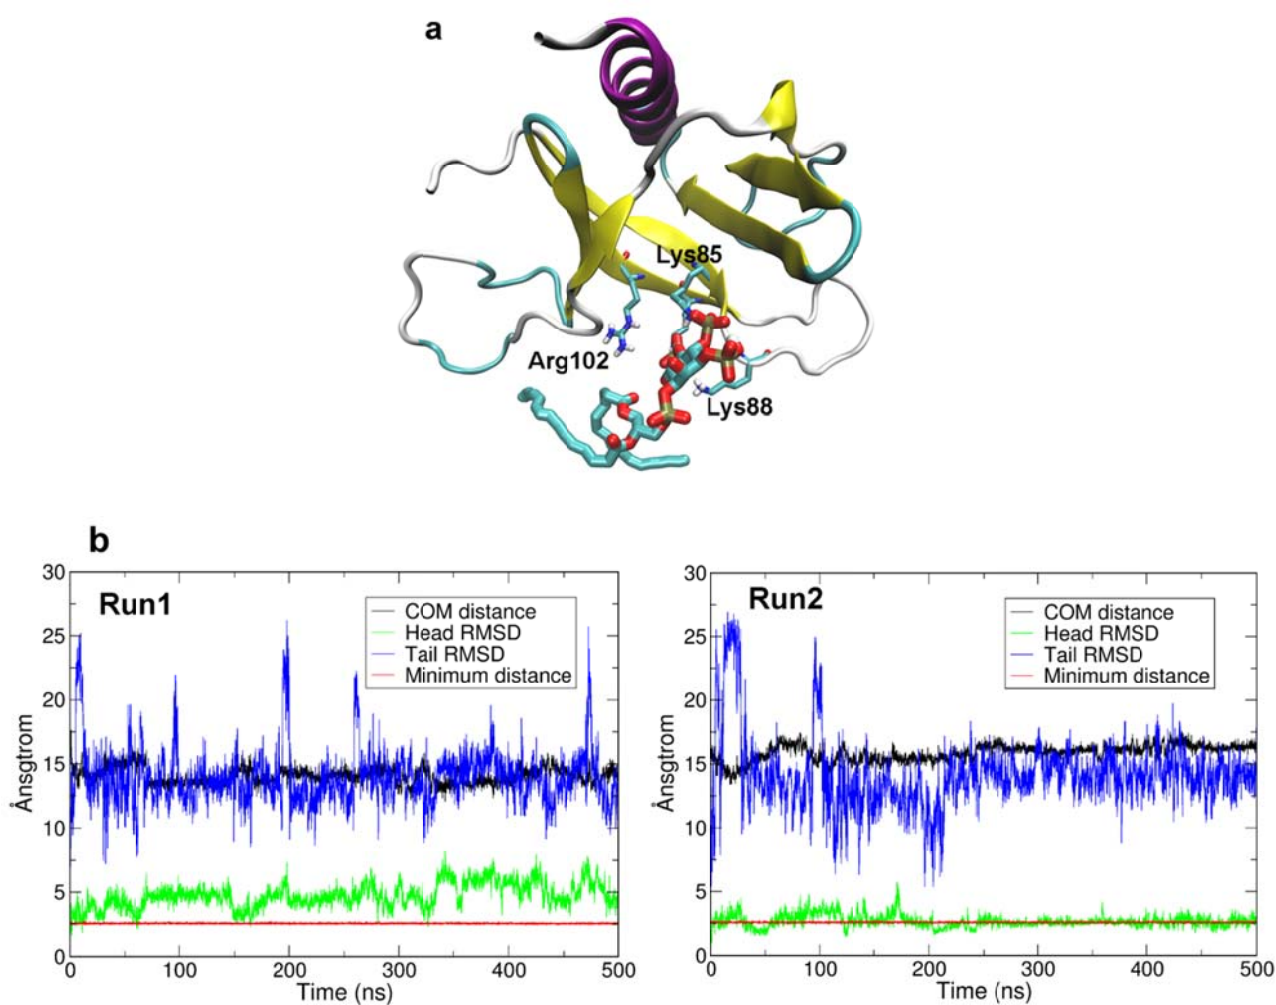

**Supplementary Figure S6. (a) Binding mode of SmCesA2-PH with the PtdIns(3,4,5)P<sub>3</sub> molecule in solution. (b) Some parameters used to monitor the binding profile in the MD simulations.** COM distance is the distance between the centers of mass (COMs) of the inositol head group and the protein. Head RMSD is the RMSD of the inositol head group. Tail RMSD is the RMSD of the two hydrophobic tails. Minimum distance is the minimum distance between the lipid molecule and protein heavy atoms.



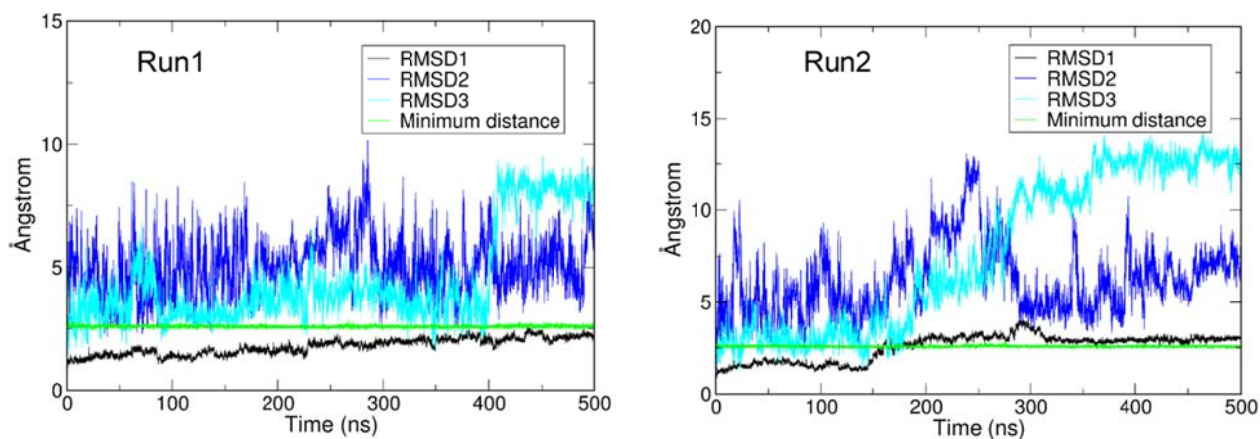

**Supplementary Figure S7. Binding profile of SmCesA2-PH on the PtdIns(3,4,5)P<sub>3</sub>/POPC membrane in two independent MD simulations.** The figures show the plots of the RMSDs of the backbone atoms of the  $\beta$ -sandwich and  $\alpha$ -helix core structure (RMSD1, black), VL1 (RMSD2, blue) and VL2 (RMSD3, cyan) as well as the minimum distance between SmCesA2-PH and the PtdIns(3,4,5)P<sub>3</sub>/POPC membrane (green).

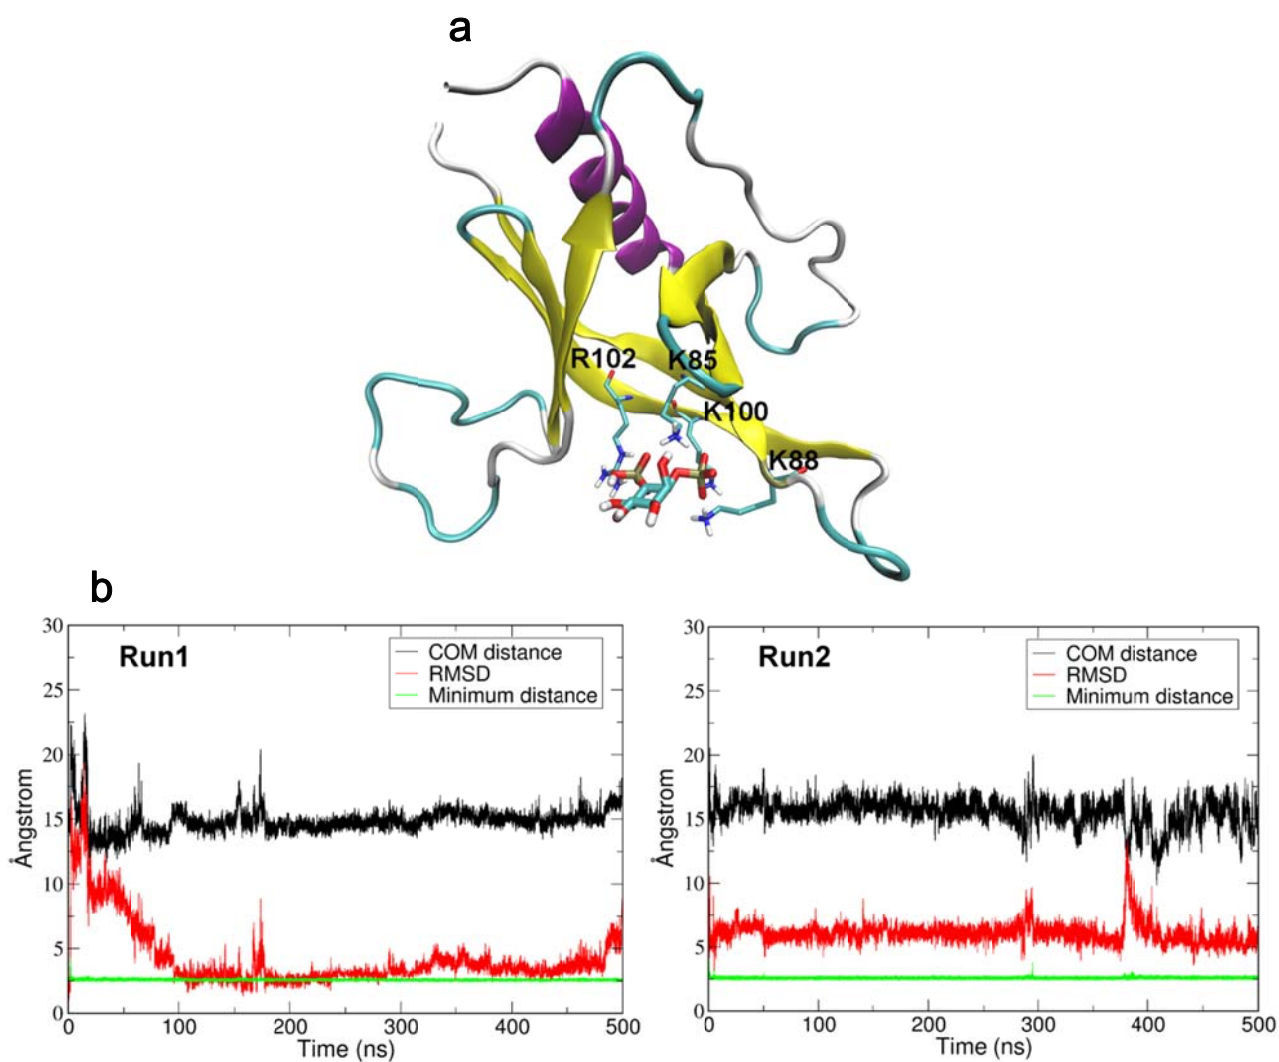

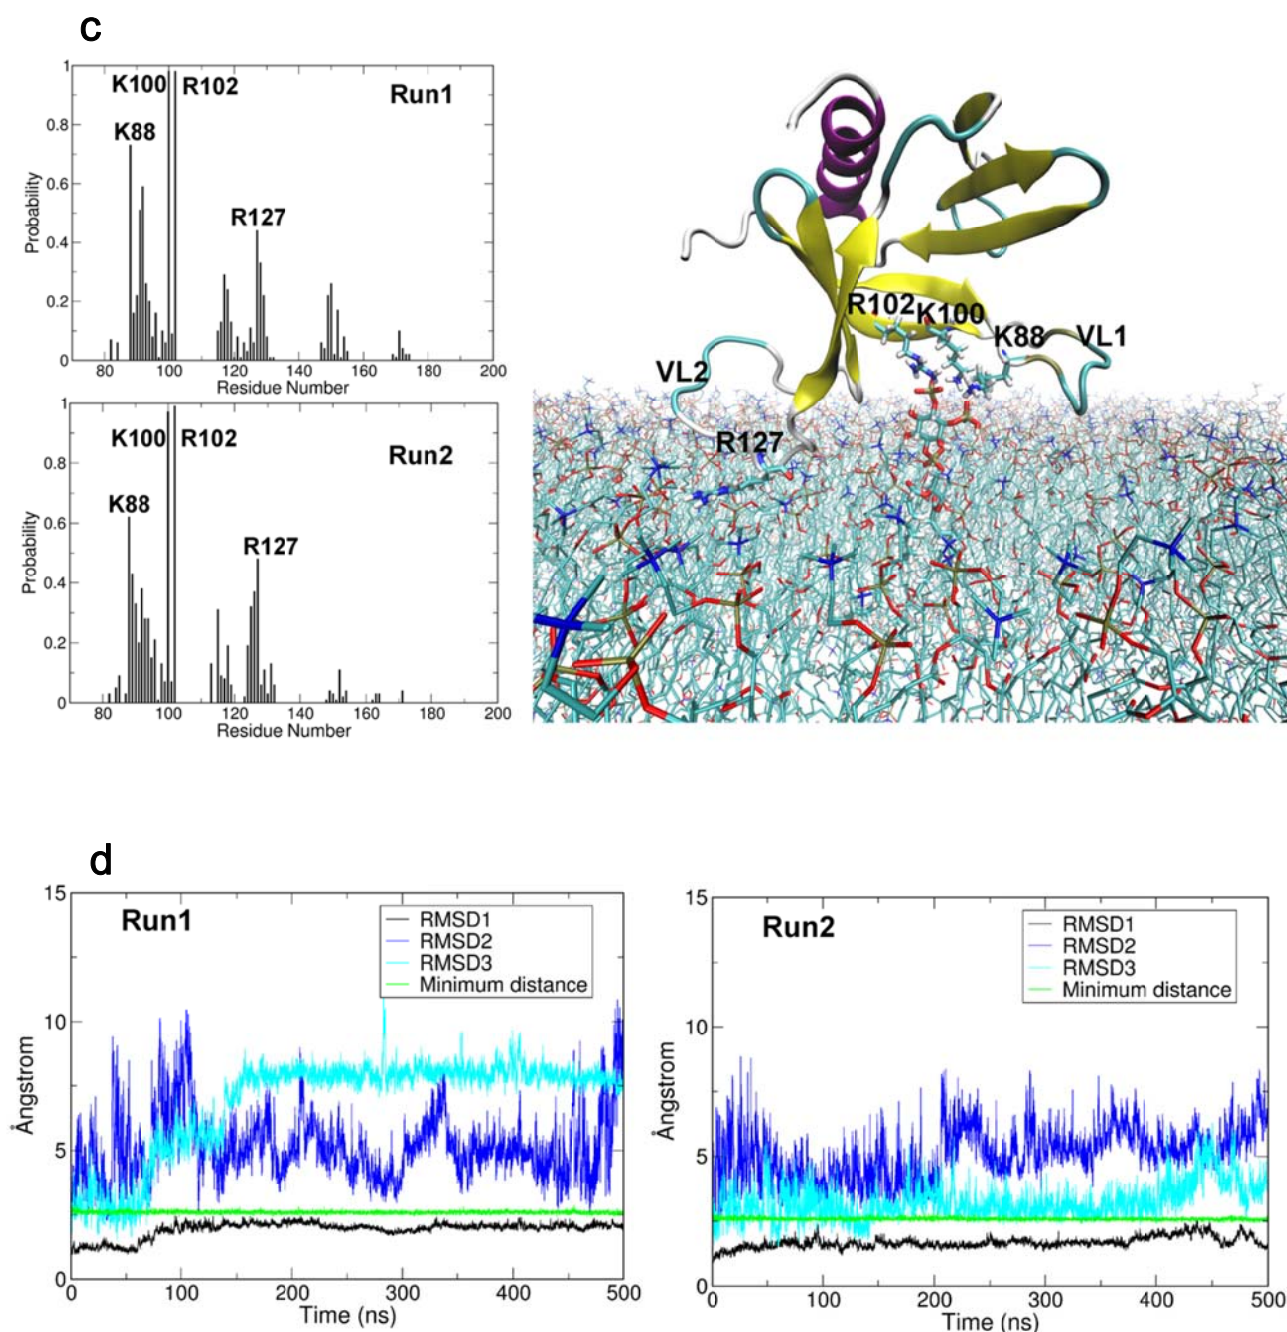

**Supplementary Figure S8. Binding profile of SmCesA2-PH with PtdIns(3,4)P<sub>2</sub>.** (a) The binding mode of SmCesA2-PH with the head group Ins(3,4)P<sub>2</sub>. (b) Some parameters used to monitor the binding profile of the head group in MD simulations. COM distance is the distance between the centers of mass (COMs) of the inositol head group and the protein. RMSD is the root mean square deviation of the head group conformation in the MD simulation after the alignment of the protein. Minimum distance is the minimum distance between the head group and protein heavy atoms. (c) The binding profile of SmCesA2-PH with the PtdIns(3,4)P<sub>2</sub>/POPC membrane which includes the contact (within 3 Å) probability plots of the amino acids of SmCesA2-PH with the PtdIns(3,4)P<sub>2</sub>/POPC membrane, and the binding mode of SmCesA2-PH with the membrane. (d)

The figures showing the plots of the RMSDs of the backbone atoms of the  $\beta$ -sandwich and  $\alpha$ -helix core structure (RMSD1, black), VL1 (RMSD2, blue) and VL2 (RMSD3, cyan) as well as the minimum distance between SmCesA2-PH and the PtdIns(3,4)P<sub>2</sub>/POPC membrane (green).

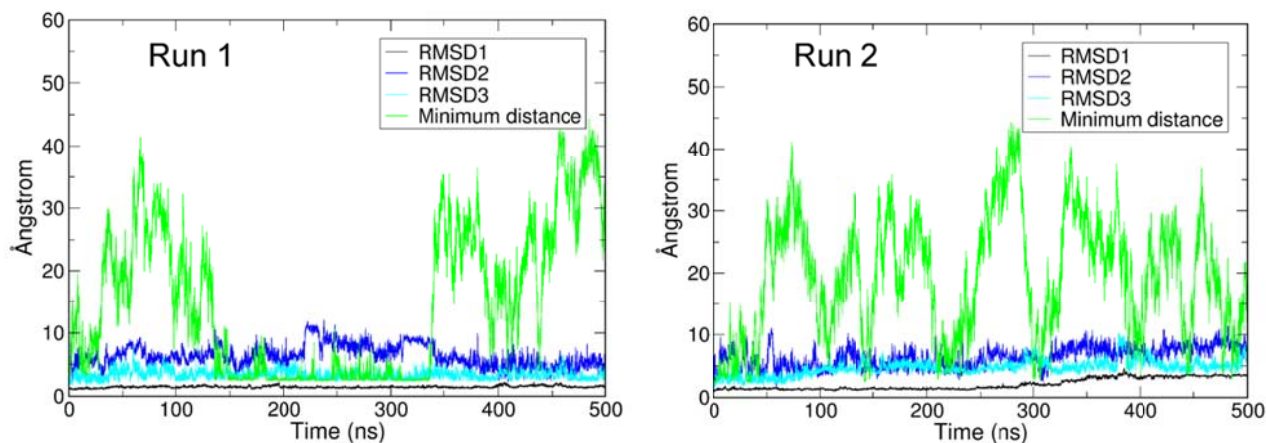

**Supplementary Figure S9. Binding profile of SmCesA2-PH on the POPC membrane in two independent MD simulations.** The figures show the plots of the RMSDs of the backbone atoms of the  $\beta$ -sandwich and  $\alpha$ -helix core structure (RMSD1, black), VL1 (RMSD2, blue) and VL2 (RMSD3, cyan) as well as the minimum distance between SmCesA2-PH and the POPC membrane (green).

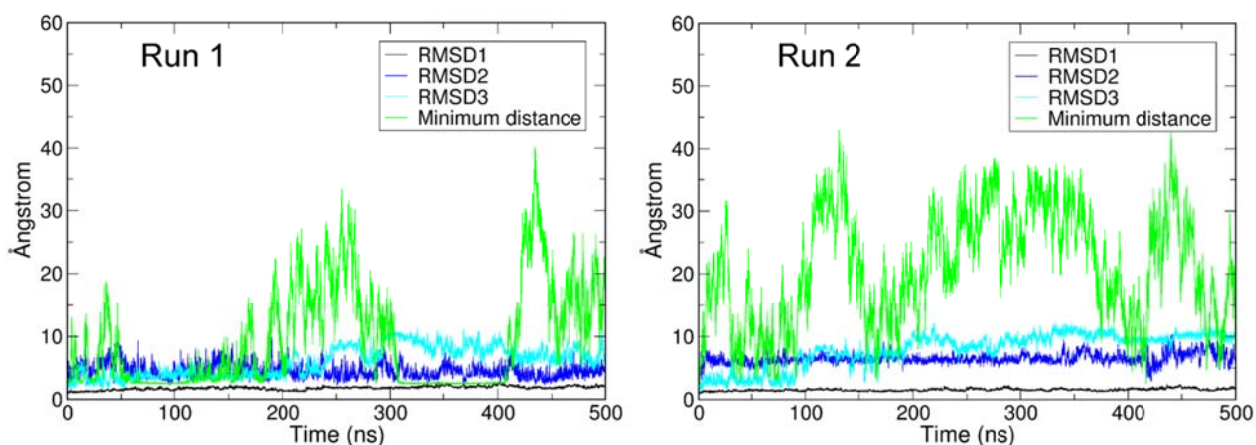

**Supplementary Figure S10. Binding profile of SmCesA2-PH on the PtdIns/POPC membrane in two independent MD simulations.** The figures show the plots of the RMSDs of the backbone atoms of the  $\beta$ -sandwich and  $\alpha$ -helix core structure (RMSD1, black), VL1 (RMSD2, blue) and VL2 (RMSD3, cyan) as well as the minimum distance between SmCesA2-PH and the PtdIns/POPC membrane.



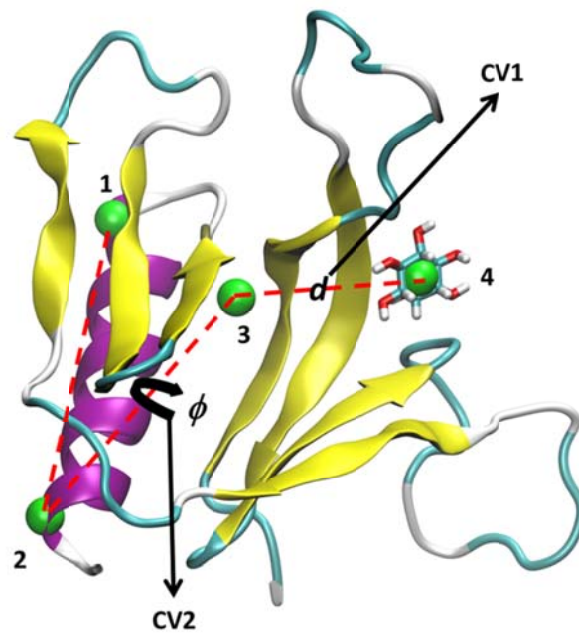

**Supplementary Figure S11. Illustration of the collective variables selected for the metadynamics simulations of the SmCesA2-Ins complex.** CV1 is the distance  $d$  between the center of mass (COM) of the ligand and that of SmCesA2-PH. CV2 is the dihedral angle (torsion  $\phi$ ) defined by the two end points of the  $\alpha$ -helix, the COM of the protein, and the COM of the ligand.

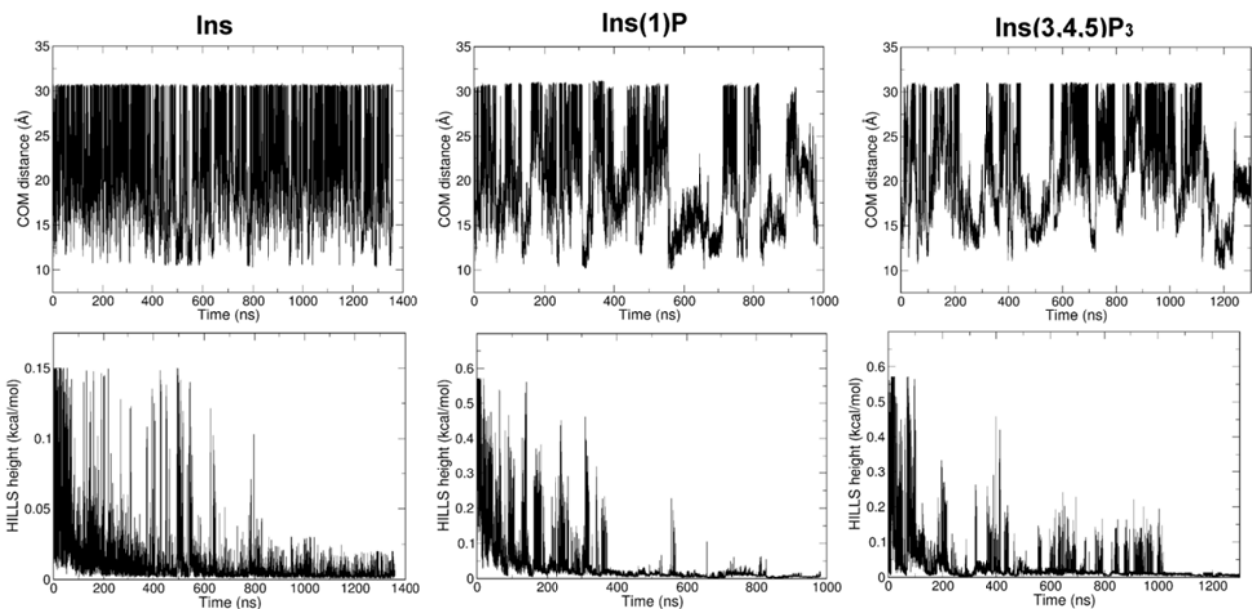

**Supplementary Figure S12. Evolutions of COM distance (CV1) and Gaussian HILLS height in the metadynamics simulations.** Several recrossing events of the distance CV and small Gaussian HILLS height (close to zero) are two common indicators of the convergence of the

metadynamics simulations. These plots indicate that the three systems have converged.

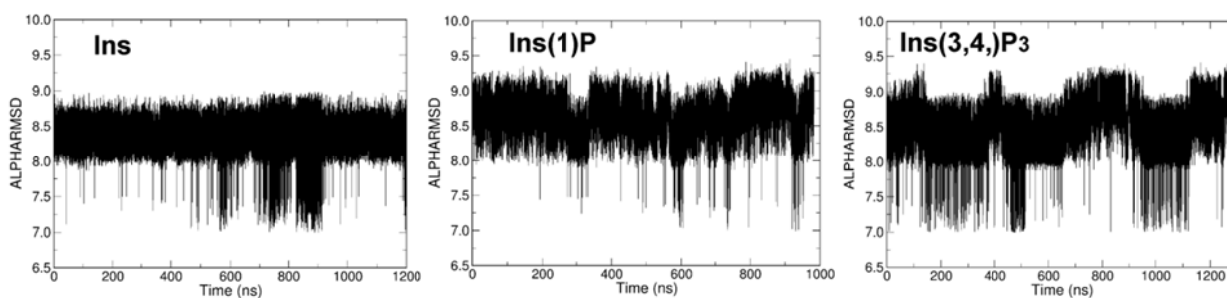

**Supplementary Figure S13. Evolutions of the ALPHARMSD in the three metadynamics simulations, which can be used to monitor the content of  $\alpha$ -helix.**

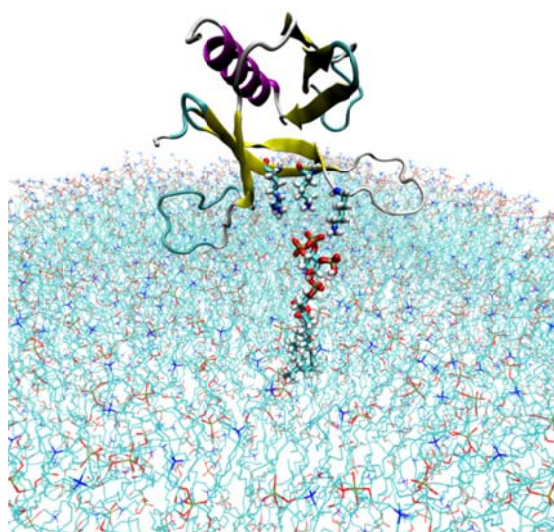

**Supplementary Figure S14. Initial setup of the SmCesA2-PH and PtdIns(3,4,5)P<sub>3</sub>/POPC membrane system.** The PtdIns(3,4,5)P<sub>3</sub> molecule and three critical residues in the binding site of SmCesA2-PH are shown in the thick stick mode and the POPC molecules in the thin stick mode. The protein is shown in the cartoon mode.

## Supplementary Videos

**Supplementary Video S1. Trajectory of SmCesA2-PH in a 500 ns MD simulation.**

**Supplementary Video S2. Binding profile of SmCesA2-PH with the PtdIns(3,4,5)P<sub>3</sub> molecule in solution in a 500 ns MD simulation.**

**Supplementary Video S3. Binding profile of SmCesA2-PH on the PtdIns(3,4,5)P<sub>3</sub>/POPC membrane in a 500 ns MD simulation.**

**Supplementary Video S4. Binding profile of SmCesA2-PH on the PtdIns(3,4)P<sub>2</sub>/POPC membrane in a 500 ns MD simulation.**

**Supplementary Video S5. Binding profile of SmCesA2-PH on the POPC membrane in a 500 ns MD simulation.**

**Supplementary Video S6. Binding profile of SmCesA2-PH on the PtdIns/POPC membrane in a 500 ns MD simulation.**

## **Appendix S1 Force field parameters of the head groups of phosphoinositides, obtained from CHARMM ParamChem web server**

### **Ins**

\* Toppar stream file generated by  
\* CHARMM General Force Field (CGenFF) program version 0.9.7.1 beta  
\* For use with CGenFF version 2b8  
\*

read rtf card append  
\* Topologies generated by  
\* CHARMM General Force Field (CGenFF) program version 0.9.7.1 beta  
\*  
36 1

! "penalty" is the highest penalty score of the associated parameters.  
! Penalties lower than 10 indicate the analogy is fair; penalties between 10  
! and 50 mean some basic validation is recommended; penalties higher than  
! 50 indicate poor analogy and mandate extensive validation/optimization.

| RESI     | INS   | 0.000 ! param penalty= | 4.000 ; charge penalty= | 0.000 |
|----------|-------|------------------------|-------------------------|-------|
| GROUP    |       | ! CHARGE               | CH_PENALTY              |       |
| ATOM O2  | OG311 | -0.655 !               | 0.000                   |       |
| ATOM O3  | OG311 | -0.655 !               | 0.000                   |       |
| ATOM O4  | OG311 | -0.655 !               | 0.000                   |       |
| ATOM O5  | OG311 | -0.655 !               | 0.000                   |       |
| ATOM O6  | OG311 | -0.655 !               | 0.000                   |       |
| ATOM C11 | CG311 | 0.146 !                | 0.000                   |       |
| ATOM C12 | CG311 | 0.146 !                | 0.000                   |       |
| ATOM O12 | OG311 | -0.655 !               | 0.000                   |       |
| ATOM C13 | CG311 | 0.146 !                | 0.000                   |       |
| ATOM C14 | CG311 | 0.146 !                | 0.000                   |       |
| ATOM C15 | CG311 | 0.146 !                | 0.000                   |       |
| ATOM C16 | CG311 | 0.146 !                | 0.000                   |       |

|          |      |         |       |
|----------|------|---------|-------|
| ATOM H1  | HGP1 | 0.419 ! | 0.000 |
| ATOM H2  | HGP1 | 0.419 ! | 0.000 |
| ATOM H3  | HGP1 | 0.419 ! | 0.000 |
| ATOM H4  | HGP1 | 0.419 ! | 0.000 |
| ATOM H5  | HGP1 | 0.419 ! | 0.000 |
| ATOM H6  | HGA1 | 0.090 ! | 0.000 |
| ATOM H7  | HGA1 | 0.090 ! | 0.000 |
| ATOM H8  | HGP1 | 0.419 ! | 0.000 |
| ATOM H9  | HGA1 | 0.090 ! | 0.000 |
| ATOM H10 | HGA1 | 0.090 ! | 0.000 |
| ATOM H11 | HGA1 | 0.090 ! | 0.000 |
| ATOM H12 | HGA1 | 0.090 ! | 0.000 |

BOND O2 C12  
BOND O3 C13  
BOND O4 C14  
BOND O5 C15  
BOND O6 C16  
BOND C11 C16  
BOND C11 C12  
BOND C11 O12  
BOND C12 C13  
BOND C13 C14  
BOND C14 C15  
BOND C15 C16  
BOND O2 H1  
BOND O3 H2  
BOND O4 H3  
BOND O5 H4  
BOND O6 H5  
BOND C11 H6  
BOND C12 H7  
BOND O12 H8  
BOND C13 H9  
BOND C14 H10  
BOND C15 H11  
BOND C16 H12

END

read param card flex append

\* Parameters generated by analogy by

\* CHARMM General Force Field (CGenFF) program version 0.9.7.1 beta

\*

! Penalties lower than 10 indicate the analogy is fair; penalties between 10  
! and 50 mean some basic validation is recommended; penalties higher than  
! 50 indicate poor analogy and mandate extensive validation/optimization.

BONDS

ANGLES

DIHEDRALS

|       |       |       |       |        |   |                                                           |
|-------|-------|-------|-------|--------|---|-----------------------------------------------------------|
| CG311 | CG311 | CG311 | CG311 | 0.5000 | 4 | 180.00 ! INS , from CG311 CG311 CG311 CG321, penalty= 0.6 |
| OG311 | CG311 | CG311 | OG311 | 0.2000 | 3 | 0.00 ! INS , from OG311 CG311 CG321 OG311, penalty= 4     |

IMPROPERS

END

RETURN

## Ins(1)P (PIP)

\* Toppar stream file generated by

\* CHARMM General Force Field (CGenFF) program version 0.9.7.1 beta

\* For use with CGenFF version 2b8

\*



read rtf card append  
 \* Topologies generated by  
 \* CHARMM General Force Field (CGenFF) program version 0.9.7.1 beta  
 \*  
 36 1

! "penalty" is the highest penalty score of the associated parameters.  
 ! Penalties lower than 10 indicate the analogy is fair; penalties between 10  
 ! and 50 mean some basic validation is recommended; penalties higher than  
 ! 50 indicate poor analogy and mandate extensive validation/optimization.

| RESI PIP |       | -2.000 ! param penalty= | 4.600 ; charge penalty= | 2.132 |
|----------|-------|-------------------------|-------------------------|-------|
| GROUP    |       | ! CHARGE                | CH_PENALTY              |       |
| ATOM C11 | CG311 | 0.146 !                 | 2.087                   |       |
| ATOM C12 | CG311 | 0.146 !                 | 0.000                   |       |
| ATOM C13 | CG311 | 0.146 !                 | 2.087                   |       |
| ATOM C14 | CG311 | 0.150 !                 | 2.132                   |       |
| ATOM C15 | CG311 | -0.098 !                | 1.313                   |       |
| ATOM C16 | CG311 | 0.150 !                 | 2.132                   |       |
| ATOM O5  | OG303 | -0.399 !                | 1.313                   |       |
| ATOM P5  | PG2   | 1.099 !                 | 0.106                   |       |
| ATOM OP4 | OG2P1 | -0.900 !                | 0.000                   |       |
| ATOM OP5 | OG2P1 | -0.900 !                | 0.000                   |       |
| ATOM OP6 | OG2P1 | -0.900 !                | 0.000                   |       |
| ATOM O4  | OG311 | -0.655 !                | 0.300                   |       |
| ATOM O6  | OG311 | -0.655 !                | 0.300                   |       |
| ATOM O3  | OG311 | -0.655 !                | 0.000                   |       |
| ATOM O12 | OG311 | -0.655 !                | 0.000                   |       |
| ATOM O2  | OG311 | -0.655 !                | 0.000                   |       |
| ATOM H1  | HGA1  | 0.090 !                 | 0.000                   |       |
| ATOM H2  | HGA1  | 0.090 !                 | 0.000                   |       |
| ATOM H3  | HGA1  | 0.090 !                 | 0.000                   |       |
| ATOM H4  | HGA1  | 0.090 !                 | 0.300                   |       |
| ATOM H5  | HGA1  | 0.090 !                 | 0.000                   |       |
| ATOM H6  | HGA1  | 0.090 !                 | 0.300                   |       |
| ATOM H7  | HGP1  | 0.419 !                 | 0.000                   |       |
| ATOM H8  | HGP1  | 0.419 !                 | 0.000                   |       |
| ATOM H9  | HGP1  | 0.419 !                 | 0.000                   |       |
| ATOM H10 | HGP1  | 0.419 !                 | 0.000                   |       |
| ATOM H11 | HGP1  | 0.419 !                 | 0.000                   |       |

BOND C11 C16  
 BOND C11 O12  
 BOND C11 C12  
 BOND C12 O2  
 BOND C12 C13  
 BOND C13 C14  
 BOND C13 O3  
 BOND C14 O4  
 BOND C14 C15  
 BOND C15 O5  
 BOND C15 C16  
 BOND C16 O6  
 BOND O5 P5  
 BOND P5 OP4  
 BOND P5 OP6  
 BOND P5 OP5  
 BOND C11 H1  
 BOND C12 H2  
 BOND C13 H3  
 BOND C14 H4  
 BOND C15 H5  
 BOND C16 H6  
 BOND O4 H7  
 BOND O6 H8  
 BOND O3 H9  
 BOND O12 H10  
 BOND O2 H11

END

read param card flex append

\* Parameters generated by analogy by  
 \* CHARMM General Force Field (CGenFF) program version 0.9.7.1 beta  
 \*

! Penalties lower than 10 indicate the analogy is fair; penalties between 10  
 ! and 50 mean some basic validation is recommended; penalties higher than  
 ! 50 indicate poor analogy and mandate extensive validation/optimization.

BONDS

ANGLES

CG311 CG311 OG303 115.00 109.70 ! PIP , from CG331 CG311 OG303, penalty= 1.5

DIHEDRALS

CG311 CG311 CG311 CG311 0.5000 4 180.00 ! PIP , from CG311 CG311 CG311 CG321, penalty= 0.6  
 CG311 CG311 CG311 OG303 0.2000 3 180.00 ! PIP , from CG321 CG311 CG321 OG303, penalty= 4.6  
 OG303 CG311 CG311 OG311 0.2000 3 0.00 ! PIP , from OG311 CG311 CG321 OG303, penalty= 4  
 OG303 CG311 CG311 HGA1 0.1950 3 0.00 ! PIP , from HGA1 CG311 CG321 OG303, penalty= 4  
 OG311 CG311 CG311 OG311 0.2000 3 0.00 ! PIP , from OG311 CG311 CG321 OG311, penalty= 4  
 CG311 CG311 OG303 PG2 0.4000 1 180.00 ! PIP , from CG331 CG311 OG303 PG2, penalty= 1.5  
 CG311 CG311 OG303 PG2 0.3000 2 0.00 ! PIP , from CG331 CG311 OG303 PG2, penalty= 1.5  
 CG311 CG311 OG303 PG2 0.1000 3 0.00 ! PIP , from CG331 CG311 OG303 PG2, penalty= 1.5

IMPROPERS

END

RETURN

## Ins(3,4)P<sub>2</sub> (PIP2)

\* Toppar stream file generated by  
 \* CHARMM General Force Field (CGenFF) program version 0.9.7.1 beta  
 \* For use with CGenFF version 2b8  
 \*

read rtf card append

\* Topologies generated by  
 \* CHARMM General Force Field (CGenFF) program version 0.9.7.1 beta  
 \*

36 1

! "penalty" is the highest penalty score of the associated parameters.  
 ! Penalties lower than 10 indicate the analogy is fair; penalties between 10  
 ! and 50 mean some basic validation is recommended; penalties higher than  
 ! 50 indicate poor analogy and mandate extensive validation/optimization.

| RESI     | PIP2  | -3.000 ! param penalty= | 6.500 ; charge penalty= | 2.986 |
|----------|-------|-------------------------|-------------------------|-------|
| GROUP    | !     | CHARGE                  | CH_PENALTY              |       |
| ATOM C11 | CG311 | 0.146 !                 | 2.087                   |       |
| ATOM C12 | CG311 | 0.150 !                 | 2.984                   |       |
| ATOM C13 | CG311 | -0.094 !                | 2.470                   |       |
| ATOM C14 | CG311 | 0.003 !                 | 2.514                   |       |
| ATOM C15 | CG311 | 0.150 !                 | 2.986                   |       |
| ATOM C16 | CG311 | 0.146 !                 | 2.087                   |       |
| ATOM O3  | OG303 | -0.399 !                | 1.278                   |       |
| ATOM P3  | PG2   | 1.099 !                 | 0.106                   |       |
| ATOM O33 | OG2P1 | -0.900 !                | 0.000                   |       |
| ATOM O32 | OG2P1 | -0.900 !                | 0.000                   |       |
| ATOM O31 | OG2P1 | -0.900 !                | 0.000                   |       |
| ATOM O2  | OG311 | -0.655 !                | 0.300                   |       |
| ATOM O4  | OG303 | -0.621 !                | 1.401                   |       |
| ATOM P4  | PG1   | 1.499 !                 | 0.526                   |       |
| ATOM O42 | OG311 | -0.670 !                | 0.268                   |       |
| ATOM O41 | OG2P1 | -0.823 !                | 0.030                   |       |
| ATOM O43 | OG2P1 | -0.823 !                | 0.030                   |       |
| ATOM O12 | OG311 | -0.655 !                | 0.000                   |       |
| ATOM O5  | OG311 | -0.655 !                | 0.300                   |       |
| ATOM O6  | OG311 | -0.655 !                | 0.000                   |       |
| ATOM H11 | HGA1  | 0.090 !                 | 0.000                   |       |

|           |      |         |       |
|-----------|------|---------|-------|
| ATOM H12  | HGA1 | 0.090 ! | 0.300 |
| ATOM H13  | HGA1 | 0.090 ! | 0.300 |
| ATOM H14  | HGA1 | 0.090 ! | 0.304 |
| ATOM H15  | HGA1 | 0.090 ! | 0.300 |
| ATOM H16  | HGA1 | 0.090 ! | 0.000 |
| ATOM HO2  | HGP1 | 0.419 ! | 0.000 |
| ATOM HO42 | HGP1 | 0.341 ! | 0.000 |
| ATOM HO12 | HGP1 | 0.419 ! | 0.000 |
| ATOM HO5  | HGP1 | 0.419 ! | 0.000 |
| ATOM HO6  | HGP1 | 0.419 ! | 0.000 |

|          |      |
|----------|------|
| BOND C11 | C12  |
| BOND C11 | C16  |
| BOND C11 | O12  |
| BOND C11 | H11  |
| BOND C12 | C13  |
| BOND C12 | O2   |
| BOND C12 | H12  |
| BOND C13 | C14  |
| BOND C13 | O3   |
| BOND C13 | H13  |
| BOND C14 | C15  |
| BOND C14 | O4   |
| BOND C14 | H14  |
| BOND C15 | C16  |
| BOND C15 | O5   |
| BOND C15 | H15  |
| BOND C16 | O6   |
| BOND C16 | H16  |
| BOND O3  | P3   |
| BOND P3  | O33  |
| BOND P3  | O32  |
| BOND P3  | O31  |
| BOND O2  | HO2  |
| BOND O4  | P4   |
| BOND P4  | O42  |
| BOND P4  | O41  |
| BOND P4  | O43  |
| BOND O42 | HO42 |
| BOND O12 | HO12 |
| BOND O5  | HO5  |
| BOND O6  | HO6  |

END

read param card flex append

\* Parameters generated by analogy by

\* CHARMM General Force Field (CGenFF) program version 0.9.7.1 beta

\*

! Penalties lower than 10 indicate the analogy is fair; penalties between 10  
! and 50 mean some basic validation is recommended; penalties higher than  
! 50 indicate poor analogy and mandate extensive validation/optimization.

BONDS

ANGLES

|       |       |       |        |                                                                  |
|-------|-------|-------|--------|------------------------------------------------------------------|
| CG311 | CG311 | OG303 | 115.00 | 109.70 ! PIP2 , from CG331 CG311 OG303, penalty= 1.5             |
| CG311 | OG303 | PG1   | 20.00  | 120.00 35.00 2.33000 ! PIP2 , from CG321 OG303 PG1, penalty= 0.6 |

DIHEDRALS

|       |       |       |       |        |   |                                                            |
|-------|-------|-------|-------|--------|---|------------------------------------------------------------|
| CG311 | CG311 | CG311 | CG311 | 0.5000 | 4 | 180.00 ! PIP2 , from CG311 CG311 CG311 CG321, penalty= 0.6 |
| CG311 | CG311 | CG311 | OG303 | 0.2000 | 3 | 180.00 ! PIP2 , from CG321 CG311 CG321 OG303, penalty= 4.6 |
| OG303 | CG311 | CG311 | OG303 | 0.2000 | 3 | 0.00 ! PIP2 , from OG302 CG311 CG321 OG303, penalty= 6.5   |
| OG303 | CG311 | CG311 | OG311 | 0.2000 | 3 | 0.00 ! PIP2 , from OG311 CG311 CG321 OG303, penalty= 4     |
| OG303 | CG311 | CG311 | HGA1  | 0.1950 | 3 | 0.00 ! PIP2 , from HGA1 CG311 CG321 OG303, penalty= 4      |
| OG311 | CG311 | CG311 | OG311 | 0.2000 | 3 | 0.00 ! PIP2 , from OG311 CG311 CG321 OG311, penalty= 4     |
| CG311 | CG311 | OG303 | PG1   | 0.4000 | 1 | 180.00 ! PIP2 , from CG331 CG311 OG303 PG2, penalty= 2.5   |
| CG311 | CG311 | OG303 | PG1   | 0.3000 | 2 | 0.00 ! PIP2 , from CG331 CG311 OG303 PG2, penalty= 2.5     |
| CG311 | CG311 | OG303 | PG1   | 0.1000 | 3 | 0.00 ! PIP2 , from CG331 CG311 OG303 PG2, penalty= 2.5     |
| CG311 | CG311 | OG303 | PG2   | 0.4000 | 1 | 180.00 ! PIP2 , from CG331 CG311 OG303 PG2, penalty= 1.5   |
| CG311 | CG311 | OG303 | PG2   | 0.3000 | 2 | 0.00 ! PIP2 , from CG331 CG311 OG303 PG2, penalty= 1.5     |

|       |       |       |       |        |   |                                                        |
|-------|-------|-------|-------|--------|---|--------------------------------------------------------|
| CG311 | CG311 | OG303 | PG2   | 0.1000 | 3 | 0.00 ! PIP2 , from CG331 CG311 OG303 PG2, penalty= 1.5 |
| HGA1  | CG311 | OG303 | PG1   | 0.0000 | 3 | 0.00 ! PIP2 , from HGA1 CG311 OG303 PG2, penalty= 1    |
| CG311 | OG303 | PG1   | OG2P1 | 0.1000 | 3 | 0.00 ! PIP2 , from CG321 OG303 PG1 OG2P1, penalty= 0.6 |
| CG311 | OG303 | PG1   | OG311 | 0.9500 | 2 | 0.00 ! PIP2 , from CG321 OG303 PG1 OG311, penalty= 0.6 |
| CG311 | OG303 | PG1   | OG311 | 0.5000 | 3 | 0.00 ! PIP2 , from CG321 OG303 PG1 OG311, penalty= 0.6 |

IMPROPERS

END  
RETURN

## Ins(3,4,5)P<sub>3</sub> (PIP3)

\* Toppar stream file generated by  
 \* CHARMM General Force Field (CGenFF) program version 0.9.7.1 beta  
 \* For use with CGenFF version 2b8  
 \*

read rtf card append

\* Topologies generated by  
 \* CHARMM General Force Field (CGenFF) program version 0.9.7.1 beta  
 \*

36 1

! "penalty" is the highest penalty score of the associated parameters.  
 ! Penalties lower than 10 indicate the analogy is fair; penalties between 10  
 ! and 50 mean some basic validation is recommended; penalties higher than  
 ! 50 indicate poor analogy and mandate extensive validation/optimization.

| RESI PIP3 |       | -5.000 ! param penalty= | 6.500 ; charge penalty= | 3.268 |
|-----------|-------|-------------------------|-------------------------|-------|
| GROUP     |       | ! CHARGE                | CH_PENALTY              |       |
| ATOM P3   | PG1   | 1.499 !                 | 0.526                   |       |
| ATOM O31  | OG2P1 | -0.823 !                | 0.030                   |       |
| ATOM O32  | OG2P1 | -0.823 !                | 0.030                   |       |
| ATOM O3   | OG303 | -0.621 !                | 1.401                   |       |
| ATOM C13  | CG311 | 0.003 !                 | 3.268                   |       |
| ATOM C12  | CG311 | 0.150 !                 | 2.986                   |       |
| ATOM C11  | CG311 | 0.146 !                 | 2.952                   |       |
| ATOM C16  | CG311 | 0.150 !                 | 2.984                   |       |
| ATOM C15  | CG311 | -0.094 !                | 3.232                   |       |
| ATOM C14  | CG311 | -0.090 !                | 3.235                   |       |
| ATOM O2   | OG311 | -0.655 !                | 0.300                   |       |
| ATOM O12  | OG311 | -0.655 !                | 0.000                   |       |
| ATOM O6   | OG311 | -0.655 !                | 0.300                   |       |
| ATOM O5   | OG303 | -0.399 !                | 1.278                   |       |
| ATOM P5   | PG2   | 1.099 !                 | 0.106                   |       |
| ATOM O51  | OG2P1 | -0.900 !                | 0.000                   |       |
| ATOM O53  | OG2P1 | -0.900 !                | 0.000                   |       |
| ATOM O52  | OG2P1 | -0.900 !                | 0.000                   |       |
| ATOM O4   | OG303 | -0.399 !                | 1.242                   |       |
| ATOM P4   | PG2   | 1.099 !                 | 0.106                   |       |
| ATOM O41  | OG2P1 | -0.900 !                | 0.000                   |       |
| ATOM O43  | OG2P1 | -0.900 !                | 0.000                   |       |
| ATOM O42  | OG2P1 | -0.900 !                | 0.000                   |       |
| ATOM O33  | OG311 | -0.670 !                | 0.268                   |       |
| ATOM H13  | HGA1  | 0.090 !                 | 0.304                   |       |
| ATOM H12  | HGA1  | 0.090 !                 | 0.300                   |       |
| ATOM H11  | HGA1  | 0.090 !                 | 0.000                   |       |
| ATOM H16  | HGA1  | 0.090 !                 | 0.300                   |       |
| ATOM H15  | HGA1  | 0.090 !                 | 0.300                   |       |
| ATOM H14  | HGA1  | 0.090 !                 | 0.424                   |       |
| ATOM HO2  | HGP1  | 0.419 !                 | 0.000                   |       |
| ATOM HO12 | HGP1  | 0.419 !                 | 0.000                   |       |
| ATOM HO6  | HGP1  | 0.419 !                 | 0.000                   |       |
| ATOM HO33 | HGP1  | 0.341 !                 | 0.000                   |       |

BOND P3 O31  
 BOND P3 O32  
 BOND P3 O3



BOND P3 O33  
 BOND O3 C13  
 BOND C13 C12  
 BOND C13 C14  
 BOND C13 H13  
 BOND C12 C11  
 BOND C12 O2  
 BOND C12 H12  
 BOND C11 C16  
 BOND C11 O12  
 BOND C11 H11  
 BOND C16 C15  
 BOND C16 O6  
 BOND C16 H16  
 BOND C15 C14  
 BOND C15 O5  
 BOND C15 H15  
 BOND C14 O4  
 BOND C14 H14  
 BOND O2 HO2  
 BOND O12 HO12  
 BOND O6 HO6  
 BOND O5 P5  
 BOND P5 O51  
 BOND P5 O53  
 BOND P5 O52  
 BOND O4 P4  
 BOND P4 O41  
 BOND P4 O43  
 BOND P4 O42  
 BOND O33 HO33

END

read param card flex append

\* Parameters generated by analogy by

\* CHARMM General Force Field (CGenFF) program version 0.9.7.1 beta

\*

! Penalties lower than 10 indicate the analogy is fair; penalties between 10  
 ! and 50 mean some basic validation is recommended; penalties higher than  
 ! 50 indicate poor analogy and mandate extensive validation/optimization.

BONDS

ANGLES

CG311 CG311 OG303 115.00 109.70 ! PIP3 , from CG331 CG311 OG303, penalty= 1.5  
 CG311 OG303 PG1 20.00 120.00 35.00 2.33000 ! PIP3 , from CG321 OG303 PG1, penalty= 0.6

DIHEDRALS

CG311 CG311 CG311 CG311 0.5000 4 180.00 ! PIP3 , from CG311 CG311 CG311 CG321, penalty= 0.6  
 CG311 CG311 CG311 OG303 0.2000 3 180.00 ! PIP3 , from CG321 CG311 CG321 OG303, penalty= 4.6  
 OG303 CG311 CG311 OG303 0.2000 3 0.00 ! PIP3 , from OG302 CG311 CG321 OG303, penalty= 6.5  
 OG303 CG311 CG311 OG311 0.2000 3 0.00 ! PIP3 , from OG311 CG311 CG321 OG303, penalty= 4  
 OG303 CG311 CG311 HGA1 0.1950 3 0.00 ! PIP3 , from HGA1 CG311 CG321 OG303, penalty= 4  
 OG311 CG311 CG311 OG311 0.2000 3 0.00 ! PIP3 , from OG311 CG311 CG321 OG311, penalty= 4  
 CG311 CG311 OG303 PG1 0.4000 1 180.00 ! PIP3 , from CG331 CG311 OG303 PG2, penalty= 2.5  
 CG311 CG311 OG303 PG1 0.3000 2 0.00 ! PIP3 , from CG331 CG311 OG303 PG2, penalty= 2.5  
 CG311 CG311 OG303 PG1 0.1000 3 0.00 ! PIP3 , from CG331 CG311 OG303 PG2, penalty= 2.5  
 CG311 CG311 OG303 PG2 0.4000 1 180.00 ! PIP3 , from CG331 CG311 OG303 PG2, penalty= 1.5  
 CG311 CG311 OG303 PG2 0.3000 2 0.00 ! PIP3 , from CG331 CG311 OG303 PG2, penalty= 1.5  
 CG311 CG311 OG303 PG2 0.1000 3 0.00 ! PIP3 , from CG331 CG311 OG303 PG2, penalty= 1.5  
 HGA1 CG311 OG303 PG1 0.0000 3 0.00 ! PIP3 , from HGA1 CG311 OG303 PG2, penalty= 1  
 CG311 OG303 PG1 OG2P1 0.1000 3 0.00 ! PIP3 , from CG321 OG303 PG1 OG2P1, penalty= 0.6  
 CG311 OG303 PG1 OG311 0.9500 2 0.00 ! PIP3 , from CG321 OG303 PG1 OG311, penalty= 0.6  
 CG311 OG303 PG1 OG311 0.5000 3 0.00 ! PIP3 , from CG321 OG303 PG1 OG311, penalty= 0.6

IMPROPERS

END

RETURN
